# Supplementary material for: The G132S Mutation Enhances the Resistance of Mycobacterium tuberculosis β-Lactamase against Sulbactam
Source: PubMed Central journal article supplement — Biochemistry. 2021 Jul 12;60(28):2236–45. doi: 10.1021/acs.biochem.1c00168 (PMC8383266; doi:10.1021/acs.biochem.1c00168), 2021-07-12
Supplement: bi1c00168_si_001.pdf [file bi1c00168_si_001.pdf]

15 **Table S1.** List of primers used to introduce mutations in *blaC*.

| <b>Mutation</b> | <b>Primers</b>                                                                |
|-----------------|-------------------------------------------------------------------------------|
| <b>A55E</b>     | CAACCGGCACCACCGAAGCAATTGAATATCGTG<br>CACGATATTCAATTGCTTCGGTGGTGCCG GTTG       |
| <b>G132S</b>    | GCAATTCGTTATAGTGATAGCACCGCAGCCAATC<br>GATTGGCTGCGGTGCTATCACTATAACGAATTGC      |
| <b>D172N</b>    | GCCTGGTGATGAACGTAATACCACCACACCGCATGC<br>GCATGCGGTGTGGTGGTATTACGTTTCATCACCAGGC |
| <b>G269S</b>    | GAGCGATCGTGCCAGTGGTGGCTATGATGCC<br>GGCATCATAGCCACCACTGGCACGATCGCTC            |

16

17

18 **Table S2.** Data collection and refinement statistics of crystal structures

|                                                       | <b>A55E</b>              | <b>G132S</b>             | <b>G132S +<br/>sulbactam</b> | <b>D172N</b>             |
|-------------------------------------------------------|--------------------------|--------------------------|------------------------------|--------------------------|
| <b>PDB</b>                                            | 7A5T                     | 7A71                     | 7A72                         | 7A5W                     |
| <b>Wavelength (Å)</b>                                 | 1.000                    | 1.000                    | 0.912                        | 1.000                    |
| <b>Resolution (Å)</b>                                 | 38.2-1.40<br>(1.42-1.40) | 44.7-1.40<br>(1.42-1.40) | 78.2-1.30<br>(1.32-1.30)     | 44.8-1.40<br>(1.42-1.40) |
| <b>Space group</b>                                    | P 1 21 1                 | P 21 21 21               | P 21 21 21                   | P 21 21 21               |
| <b>Unit cell a, b, c (Å)</b>                          | 39.00,<br>54.36, 53.69   | 53.30, 54.32,<br>78.85   | 53.49,<br>54.66, 78.20       | 54.03,<br>54.47, 78.78   |
| <b>β</b>                                              | 91.94                    | 90.00                    | 90.00                        | 90.00                    |
| <b>CC<sub>1/2</sub></b>                               | 98.5 (75.2)              | 98.9 (65.4)              | 99.9 (65.5)                  | 99.7 (77.7)              |
| <b>R<sub>meas</sub> (%)</b>                           | 13.4 (56.8)              | 16.3 (130.6)             | 9.3 (140.7)                  | 7.5 (94.7)               |
| <b>&lt;I/σ(I)&gt;</b>                                 | 5.2 (1.7)                | 8.3 (2.6)                | 11.1 (1.3)                   | 9.3 (1.8)                |
| <b>Completeness (%)</b>                               | 96.9 (94.2)              | 98.9 (97.4)              | 98.2 (99.8)                  | 98.0 (98.0)              |
| <b>Multiplicity</b>                                   | 2.5                      | 3.7                      | 5.7                          | 3.0                      |
| <b>Unique reflections</b>                             | 42718                    | 45293                    | 56098                        | 45377                    |
| <b>Atoms protein/ligands/water</b>                    | 2013/59/207              | 2047/61/201              | 2034/37/221                  | 2008/29/156              |
| <b>Bfactors protein/ligands/water (Å<sup>2</sup>)</b> | 10/22/19                 | 8/25/20                  | 15/24/26                     | 16/28/28                 |
| <b>R<sub>work</sub>/R<sub>free</sub> (%)</b>          | 14.8/17.7                | 13.0/16.1                | 15.2/18.9                    | 13.5/17.2                |
| <b>Bond lengths RMSZ/RMSD (Å)</b>                     | 1.056/0.014              | 1.270/0.016              | 1.249/0.016                  | 1.236/0.016              |
| <b>Bond angles RMSZ/RMSD (°)</b>                      | 1.085/1.781              | 1.120/1.837              | 1.168/1.940                  | 1.155/1.919              |
| <b>Ramachandran plot<br/>preferred/outliers</b>       | 248/2                    | 248/2                    | 259/2                        | 245/2                    |
| <b>RamaZ score</b>                                    | -1.177                   | -0.595                   | -0.889                       | -1.019                   |
| <b>Clash score</b>                                    | 2.42                     | 4.52                     | 1.94                         | 1.48                     |
| <b>MolProbity score</b>                               | 1.02                     | 1.23                     | 0.96                         | 0.89                     |

20 **Table S3.** Overview of non-synonymous and synonymous mutations found during screenings for  
 21 resistance against sulbactam.

| <b>Clones</b> | <b>Non-synonymous mutations</b> |              | <b>Synonymous mutations</b> |              |
|---------------|---------------------------------|--------------|-----------------------------|--------------|
|               | <b>Amino acid</b>               | <b>Codon</b> | <b>Amino acid</b>           | <b>Codon</b> |
| <b>1</b>      | D172N                           | GAT > AAT    | S130S                       | AGT > AGC    |
|               | G269S                           | GGT > AGT    |                             |              |
| <b>2</b>      | A55E                            | GCA > GAA    | R61R                        | CGT > CGC    |
|               | D100E                           | GAT > GAA    | F66F                        | TTT > TTC    |
|               | G132S                           | GGC > AGC    | V194V                       | GTT > GTA    |
|               | D179N                           | GAT > AAT    | D209D                       | GAT > GAC    |
| <b>3</b>      | G132S                           | GGC > AGC    | A51A                        | GCA > GCT    |

22

23 **Table S4.** Melting temperatures of BlaC mutants. Thermal shift measurements were performed  
 24 with SYPRO orange fluorescent dye and melting curves were fitted to determine the melting  
 25 temperature. Values represent the average and standard deviation of six measurements.

| <b>Protein</b> | <b>T<sub>m</sub> (SD) (°C)</b> |
|----------------|--------------------------------|
| <b>WT</b>      | 52.5 (0.3)                     |
| <b>A55E</b>    | 52.4 (0.2)                     |
| <b>G132S</b>   | 52.5 (0.2)                     |
| <b>D172N</b>   | 55.5 (0.1)                     |
| <b>G269S</b>   | 53.1 (0.4)                     |

26

27

28 **Table S5.** Kinetic parameters for the inactivation of BlaC and BlaC G132S by sulbactam as  
29 determined with model 3.  $K_i$  is the ratio  $k_6/k_5$ . Measurements were performed in duplicate. Errors  
30 in brackets represent one standard deviation.

|       | $K_i$                  | $k_7$                      | $k_8$                      |
|-------|------------------------|----------------------------|----------------------------|
| BlaC  | $(10^1 \mu\text{M})$   | $(10^{-2} \text{ s}^{-1})$ | $(10^{-3} \text{ s}^{-1})$ |
| WT    | 3.4 (0.3) <sup>a</sup> | 10 (1)                     | 11.7 (0.3)                 |
| G132S | 17 (1) <sup>a</sup>    | 5.95 (0.02)                | 15.2 (0.4)                 |

31 <sup>a</sup> Errors represent propagated standard deviation.

32

33

|                    |            |            |             |                   |            |
|--------------------|------------|------------|-------------|-------------------|------------|
| <u>MAN</u> NDLFQAS | RRRFLAQLGG | LTVAGMLGPS | LLTPRRATAA  | <u>QADLADRFAE</u> | LERRYDARLG |
|                    |            |            |             | <u>30</u>         | <u>40</u>  |
| VYVPATGTTA         | AIEYRADERF | AFCSTFKAPL | VAAVLHQNPLT | HLDKLITYT         | SDDIRISIPV |
| <u>50</u>          | <u>60</u>  | <u>70</u>  | <u>80</u>   | <u>90</u>         | <u>100</u> |
| AQQHVQTGMT         | IGQLCDAAIR | YSDGTAANLL | LADLGGPGGGT | AAFTGYLRS         | LGDTVSRLDA |
| <u>110</u>         | <u>120</u> | <u>130</u> | <u>140</u>  | <u>150</u>        | <u>160</u> |
| EEPELNRDPP         | GDERDTTTPH | AIALVLQQLV | LGNALPPDKRA | LLTDWMARN         | TTGAKRIRAG |
| <u>170</u>         | <u>180</u> | <u>190</u> | <u>200</u>  | <u>210</u>        | <u>220</u> |
| FPADWKVIDK         | TGTGDYGRAN | DIADVVSPTG | VPYVVAVMSDR | AGGGYDAEP         | REALLAEAAT |
| <u>230</u>         | <u>240</u> | <u>250</u> | <u>260</u>  | <u>270</u>        | <u>280</u> |
| CVAGVLALEH         | HHHHH      |            |             |                   |            |
| <u>290</u>         | <u>300</u> |            |             |                   |            |

34

35 **Figure S1.** Amino acid residues of BlaC as used for *in vivo* experiments. Residues 27-293 are  
36 numbered according to Ambler notation,<sup>S1</sup> this corresponds to residue numbers 43-307 of BlaC  
37 Uniprot entry P9WKD3-1. Residues of the TAT-signal sequence are underlined and the His-tag  
38 residues are highlighted in grey.

39

40

41

42

43

|            |             |            |            |            |            |                     |
|------------|-------------|------------|------------|------------|------------|---------------------|
| MGSSHHHHHH | SSGLVPRGSH  | MENLYFQ    | GDL        | ADRFAELERR | YDARLGVYVP | ATGTTAAIEY          |
|            |             |            |            | <u>30</u>  | <u>40</u>  | <u>50</u> <u>60</u> |
| RADERFAFCS | TFKAPLVAAV  | LHQNPLTHLD | KLITYTSDDI | RSISPVAQQH | VQTGMTIGQL |                     |
| <u>70</u>  | <u>80</u>   | <u>90</u>  | <u>100</u> | <u>110</u> | <u>120</u> |                     |
| CDAAIRYSDG | TAANLLLADL  | GGPGGGTAAF | TGYLRSLGDT | VSRLDAEEPE | LNRDPPGDER |                     |
| <u>130</u> | <u>140</u>  | <u>150</u> | <u>160</u> | <u>170</u> |            |                     |
| DTTTPHAIAL | VLQQLVLGNA  | LPPDKRALLT | DWMARNTGA  | KRIRAGFPAD | WKVIDKTGTG |                     |
| <u>180</u> | <u>190</u>  | <u>200</u> | <u>210</u> | <u>220</u> | <u>230</u> |                     |
| DYGRANDIAV | VWSPTGVYPYV | VAVMSDRAGG | GYDAEPREAL | LAEAATCVAG | VLA        |                     |
| <u>240</u> | <u>250</u>  | <u>260</u> | <u>270</u> | <u>280</u> | <u>290</u> |                     |

44

45 **Figure S2.** Amino acid residues of BlaC as used for *in vitro* experiments. Residues 27-293 are  
46 numbered according to Ambler notation,<sup>S1</sup> this corresponds to residue numbers 43-307 of BlaC  
47 Uniprot entry P9WKD3-1. Residues of the TEV-cleavable His-tag are highlighted in grey.

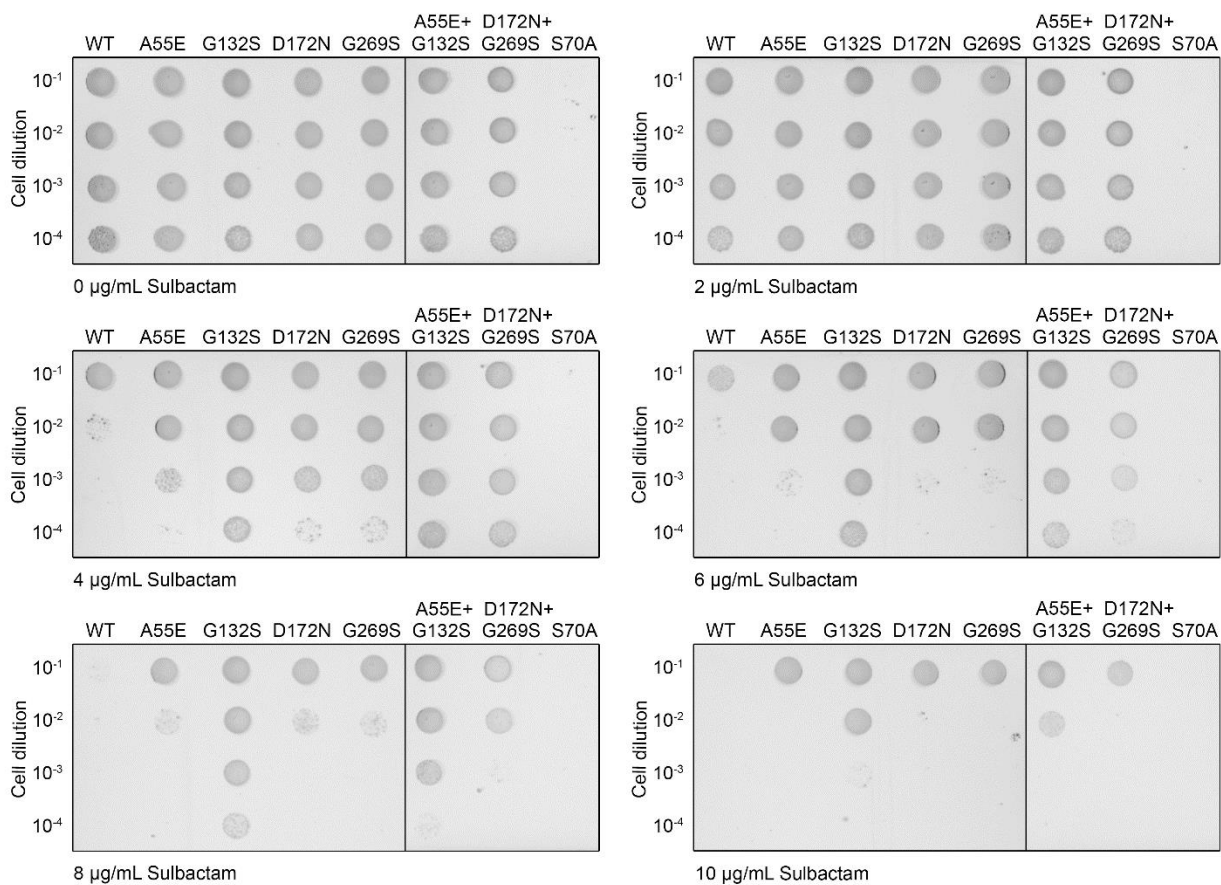

48  
 49 **Figure S3.** *In vivo* activity of Mtb BlaC mutants in *E. coli*. *E. coli* cells expressing the genes of  
 50 wild-type BlaC, and BlaC variants A55E, G132S, D172N, G269S, A55E/G132S, or D172N/G269S  
 51 were spotted on a plate containing 10 µg/mL ampicillin and sulbactam. BlaC S70A cannot  
 52 hydrolyze ampicillin and is used as a negative control. The two panels at each sulbactam  
 53 concentration originate from the same LB-agar plate.

54

55



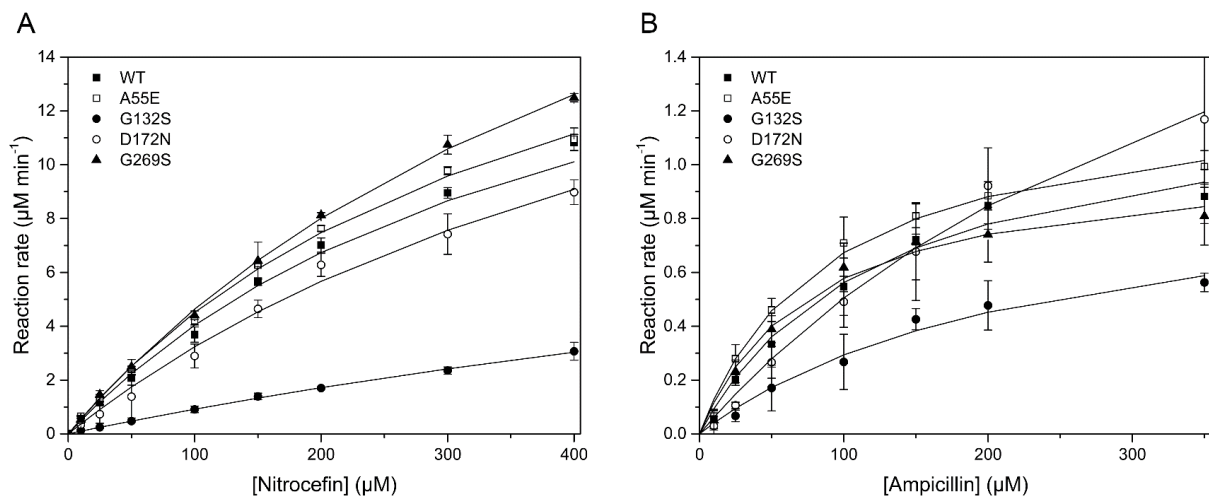

56

57 **Figure S4.** Michaelis-Menten curves of BlaC mutants for (A) nitrocefin and (B) ampicillin.

58 Experiments were performed at 25 °C in 100 mM sodium phosphate at pH 6.4. Error bars represent

59 the standard deviation of three measurements.

60

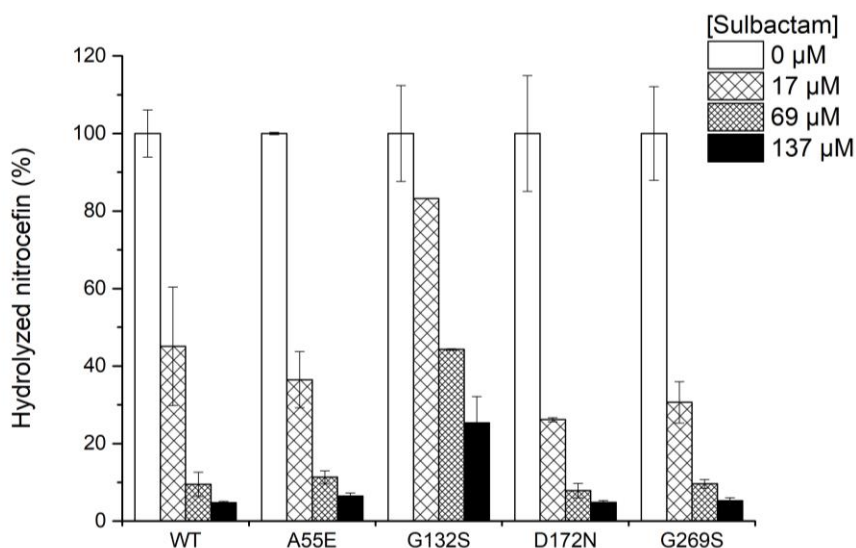

61

62 **Figure S5.** Hydrolysis of nitrocefin after incubation with sulbactam and BlaC for 15 minutes at 37

63 °C. Measurements were performed in duplicate. The error bars represent one standard deviation.

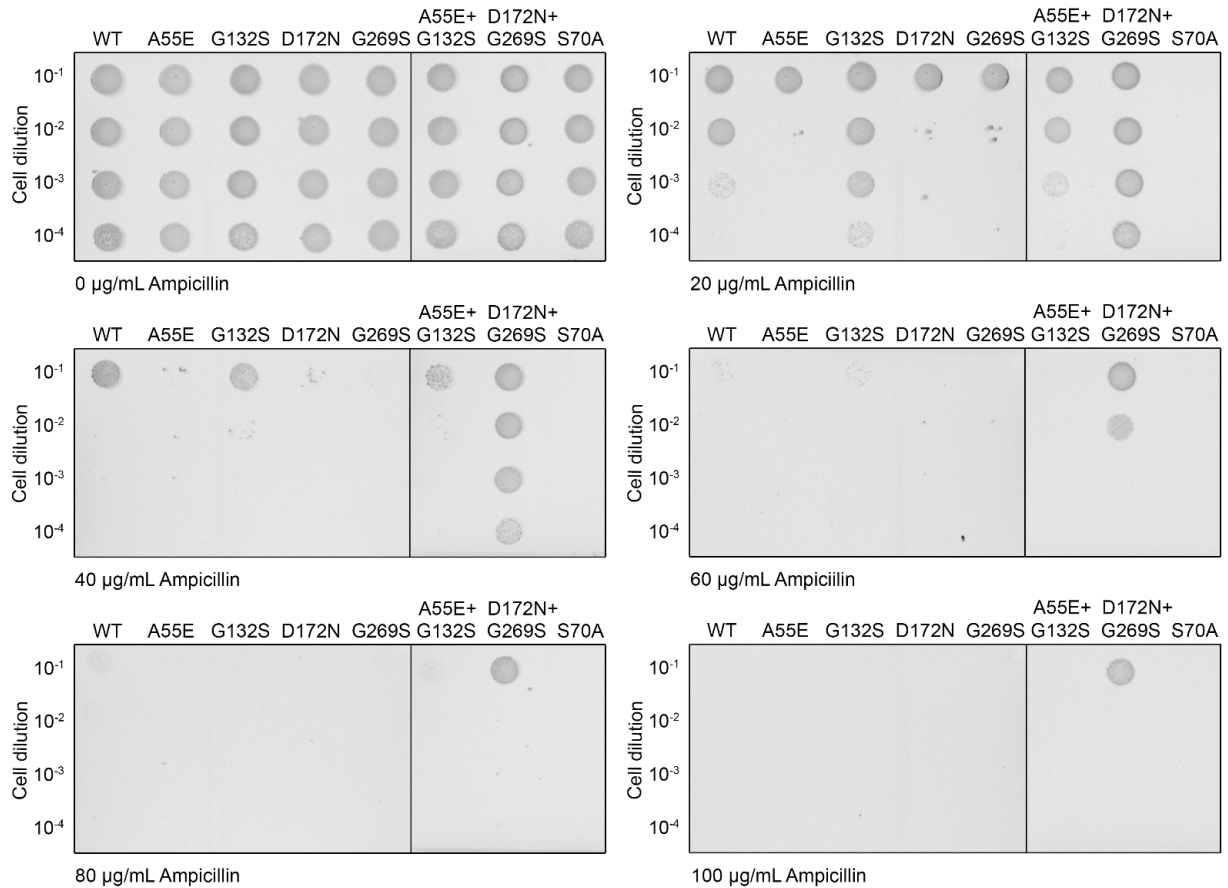

64

65 **Figure S6.** *In vivo* ampicillin conversion activity of MtB BlaC mutants in *E. coli*. *E. coli* cells  
 66 expressing the genes of wild-type BlaC, or BlaC variants A55E, G132S, D172N, G269S,  
 67 A55E/G132S, or D172N/G269S were spotted on a plate containing ampicillin. BlaC S70A cannot  
 68 hydrolyze ampicillin and is used as a negative control. The two panels at each ampicillin  
 69 concentration originate from the same LB-agar plate. Note that the combination mutant  
 70 D172N/G269S has enhanced activity against ampicillin.

71



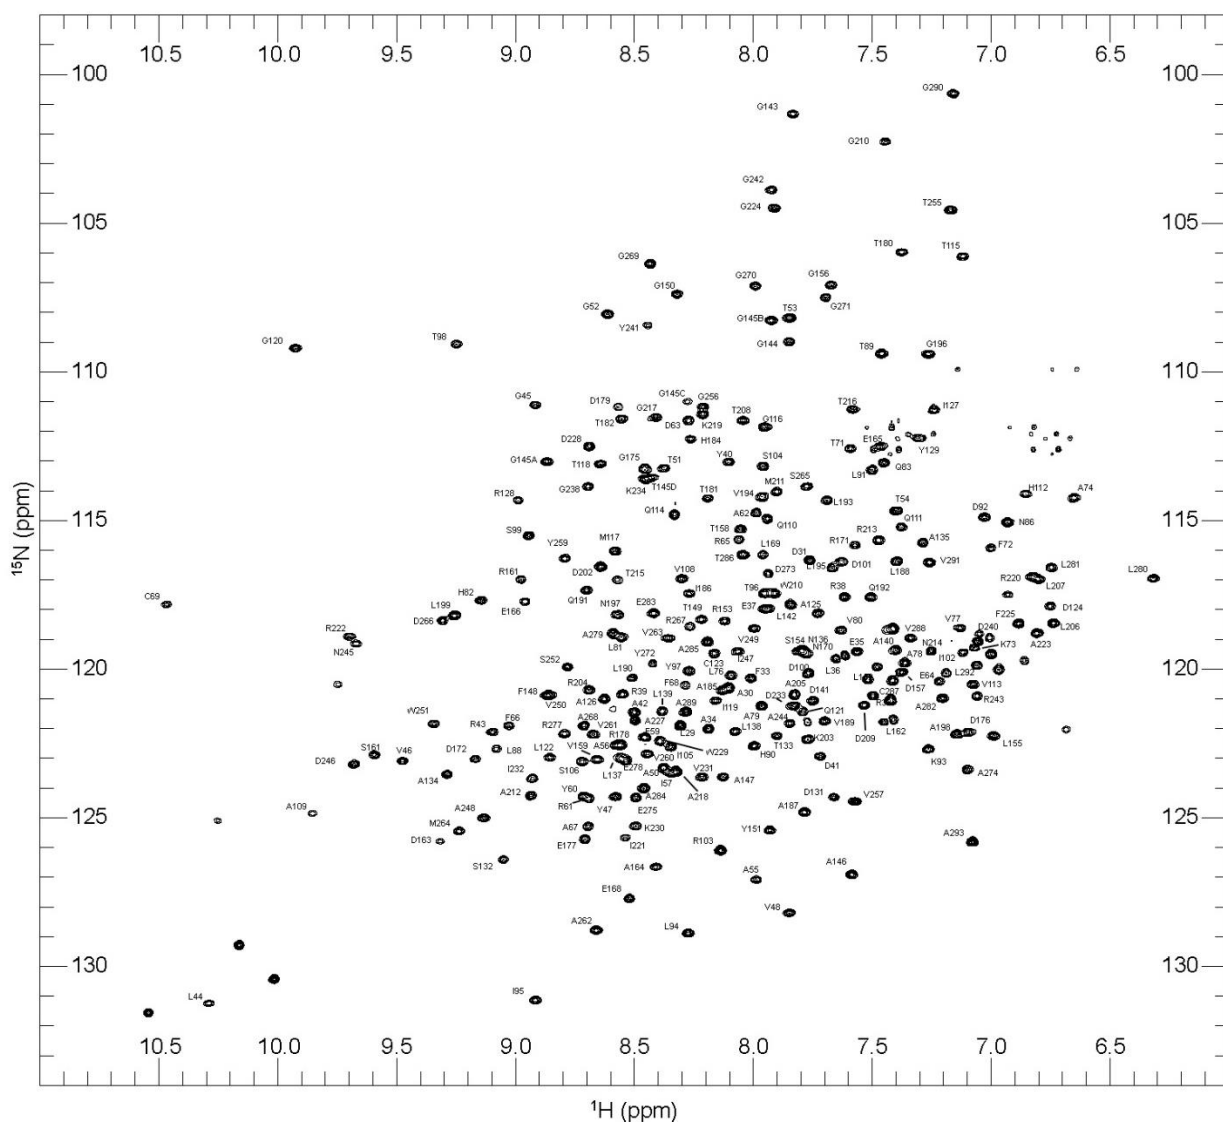

78

79 **Figure S8.** TROSY-HSQC spectrum of BlaC G132S with residue assignments. Spectrum was  
 80 obtained at 25 °C using a Bruker AVIII HD 850 MHz spectrometer equipped with a TCI cryoprobe.  
 81 Sample contained ca. 0.15 mM <sup>15</sup>N BlaC in 100 mM sodium phosphate pH 6.4 and 6% D<sub>2</sub>O.  
 82 Numbering refers to Ambler numbering.<sup>S1</sup> The assignments of the backbone amide resonances  
 83 have been deposited in the BMRB under entry 50563.



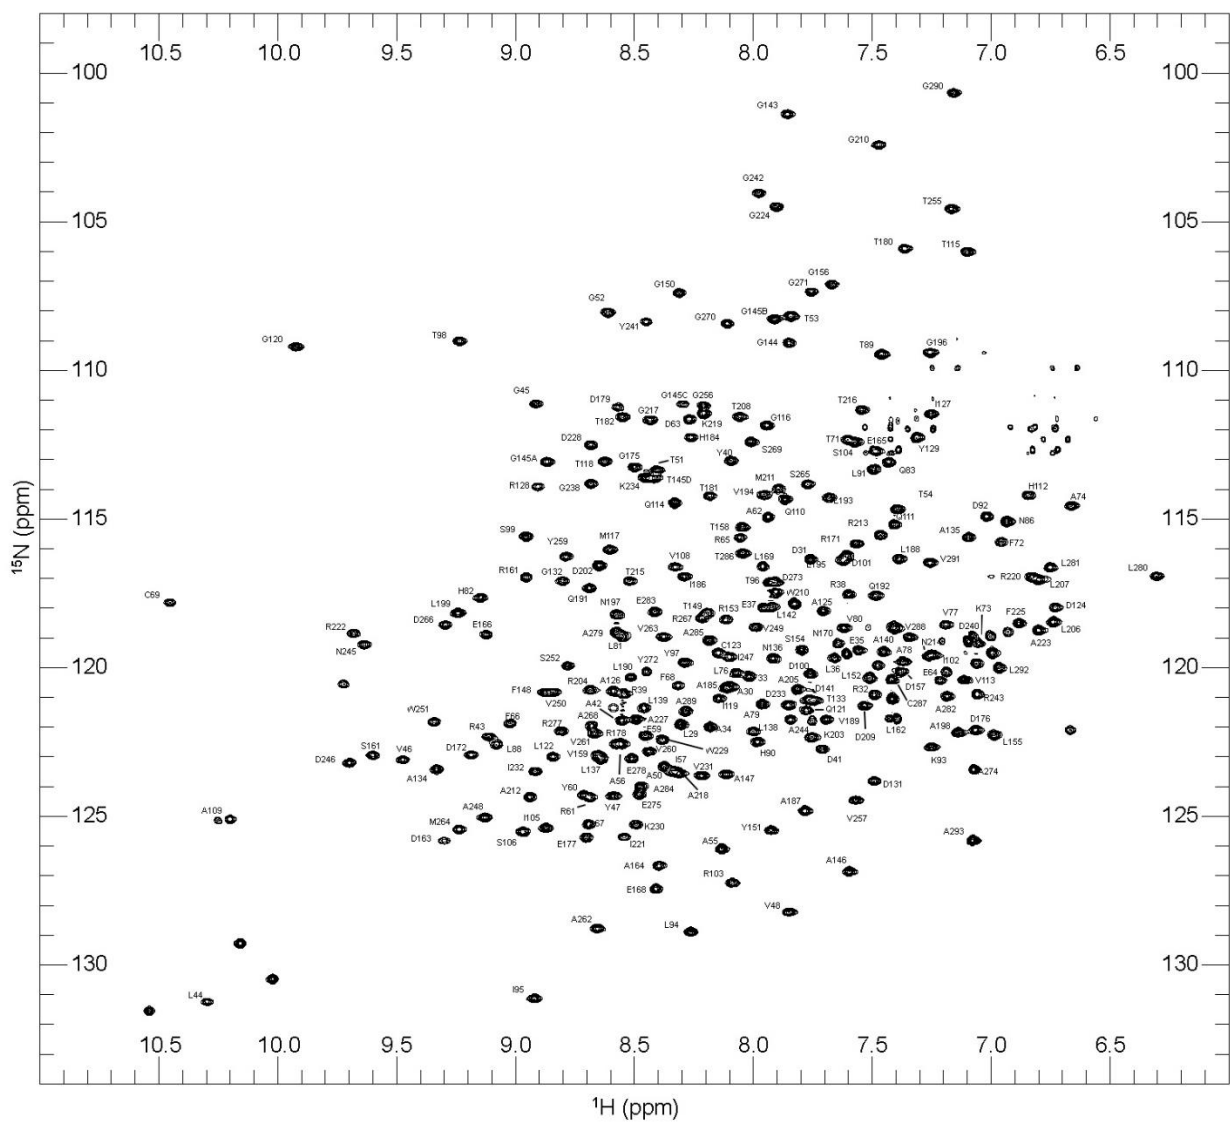

90  
91 **Figure S10.** TROSY-HSQC spectrum of BlaC G269S with residue assignments. Spectrum was  
92 obtained at 25 °C using a Bruker AVIII HD 850 MHz spectrometer equipped with a TCI cryoprobe.  
93 Sample contained ca. 0.15 mM  ${}^{15}\text{N}$  BlaC in 100 mM sodium phosphate pH 6.4 and 6%  $\text{D}_2\text{O}$ .  
94 Numbering refers to Ambler numbering.<sup>S1</sup> The assignments of the backbone amide resonances  
95 have been deposited in the BMRB under entry 50564.

96

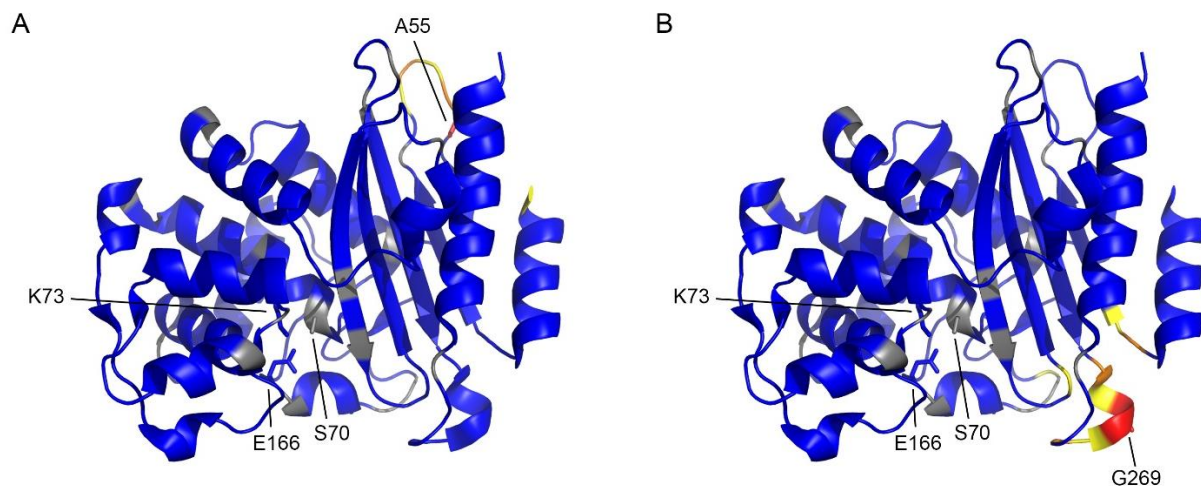

97

98 **Figure S11.** Average CSP of BlaC A55E (A) and BlaC G269S (B) plotted on the crystal structure  
99 of wild-type BlaC (PDB 5NJ2).<sup>S2</sup> Residues with CSP over 0.025, 0.05, and 0.1 ppm are displayed  
100 in yellow, orange, and red, respectively, those with no or small CSPs are in blue, and the ones for  
101 which no data were available are displayed in grey. Mutation sides are indicated and the side chains  
102 of active site residues S70, K73 and E166 are represented as sticks. For amides that were detected  
103 in the wild-type spectrum, but undetectable in the mutant spectrum, we determined the minimal  
104 chemical shift with reference to unassigned peaks and used these values to determine the CSP.

105

106

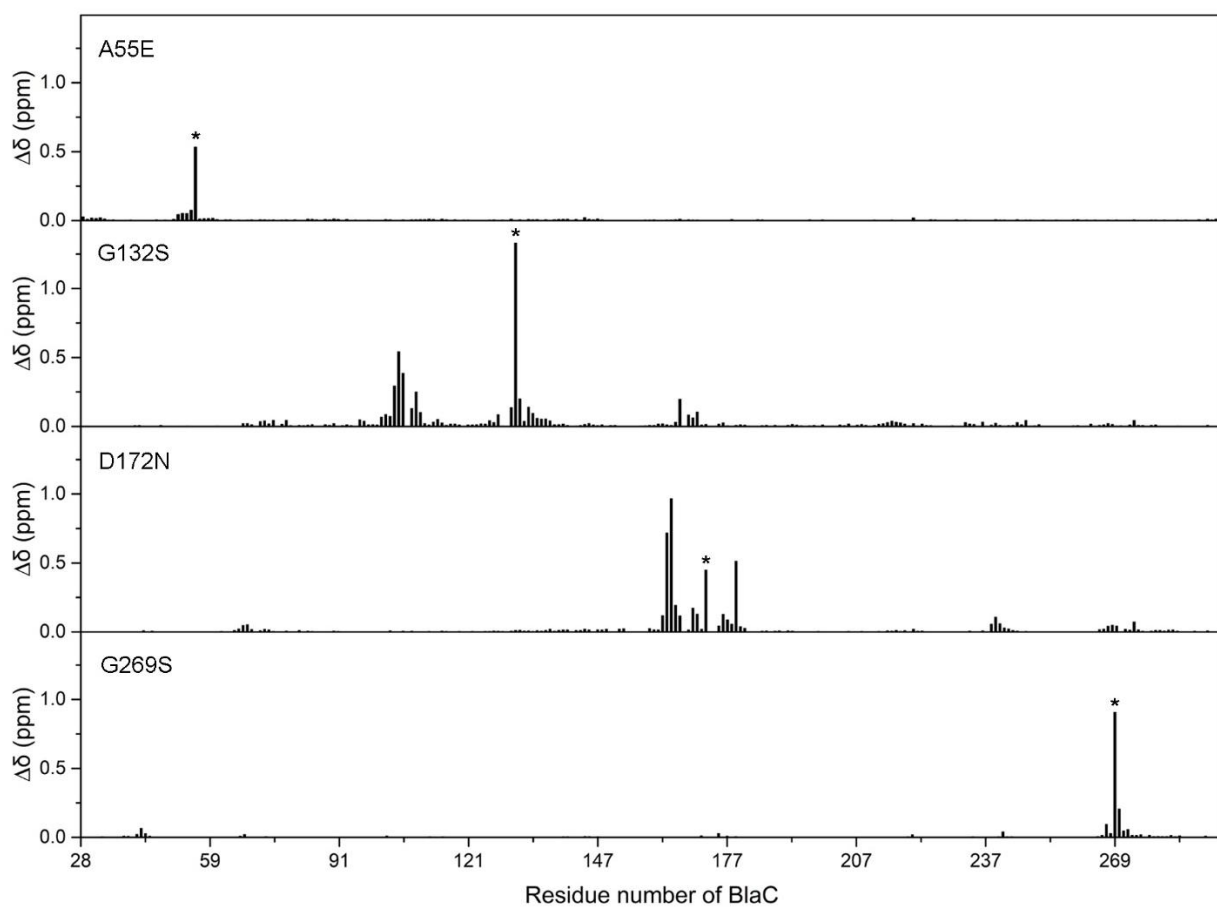

107

108 **Figure S12.** Average CSP for the backbone amides of the BlaC mutants. Residue numbers refer to  
 109 Ambler numbering.<sup>S1</sup> Mutated residues are indicated with an asterisk.



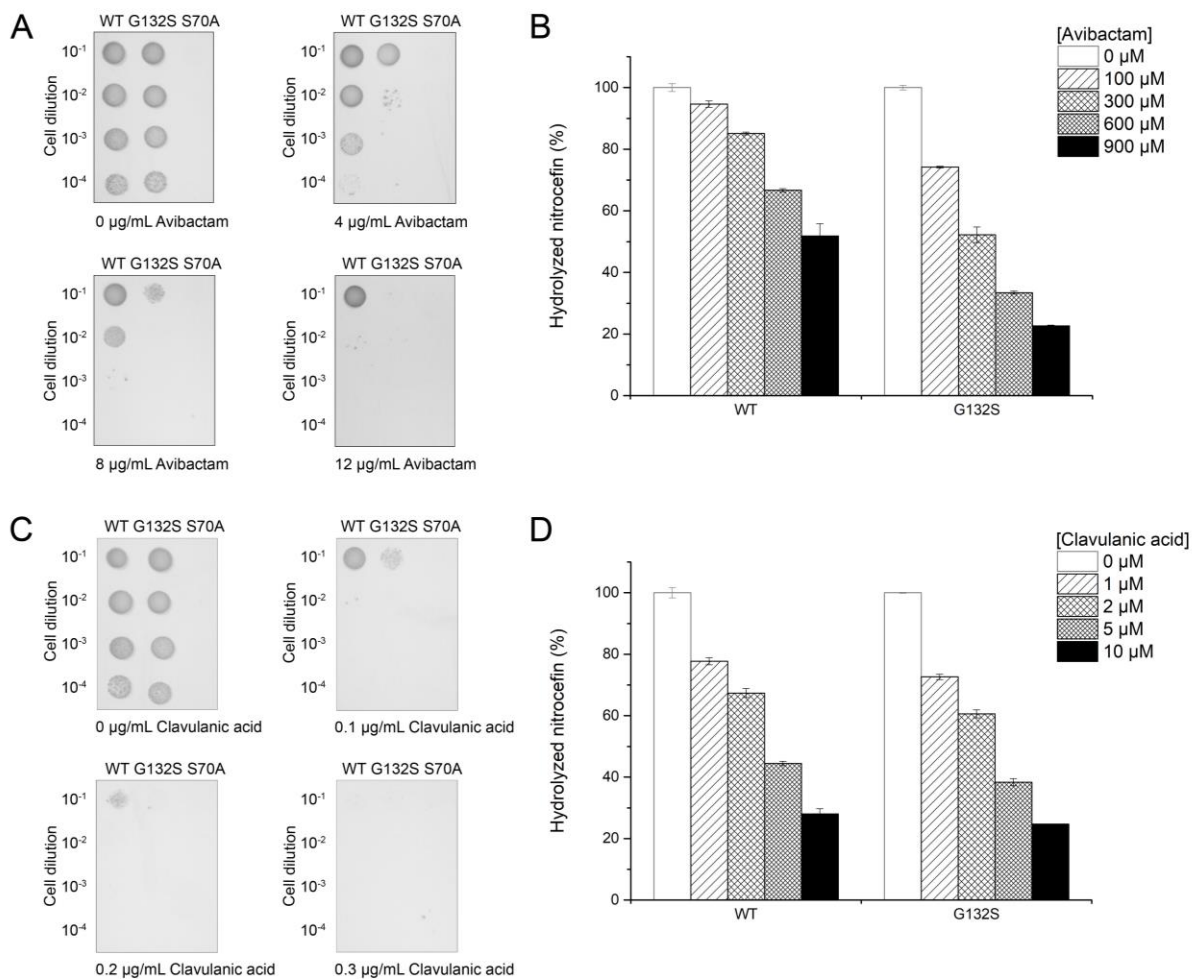

110

111 **Figure S13.** Activity of Mtb BlaC G132S. (A, C) *E. coli* cells expressing the genes of wild-type  
 112 BlaC or BlaC G132S were spotted on a plate containing 10 µg/mL ampicillin and (A) avibactam  
 113 or (C) clavulanic acid. BlaC S70A cannot hydrolyze ampicillin and is used as a negative control.  
 114 (B,D) Hydrolysis of nitrocefin by BlaC wild-type or G132S in the presence of avibactam (B) or  
 115 clavulanic acid (D) for 15 minutes at 25 °C. Measurements were performed in duplicate. The error  
 116 bars represent one standard deviation.

117

118

119 **Supplementary references**

120 (S1) Ambler, R. P., Coulson, A. F. W., Frère, J. M., Ghuysen, J. M., Joris, B., Forsman, M.,  
121 Levesque, R. C., Tiraby, G., and Waley, S. G. (1991) A standard numbering scheme for the class  
122 A  $\beta$ -lactamases. *Biochem. J.* 276, 269–270.

123 (S2) Elings, W., Tassoni, R., Van Der Schoot, S. A., Luu, W., Kynast, J. P., Dai, L., Blok, A. J.,  
124 Timmer, M., Florea, B. I., Pannu, N. S., and Ubbink, M. (2017) Phosphate promotes the recovery  
125 of *Mycobacterium tuberculosis*  $\beta$ -Lactamase from clavulanic acid inhibition. *Biochemistry* 56,  
126 6257–6267.

127
